# Supplementary material for: Harnessing agent-based frameworks in CellAgentChat to unravel cell–cell interactions from single-cell and spatial transcriptomics
Source: HighWire-hosted journal article supplement (doi:10.1101/gr.279771.124), 2025-05-02
Supplement: Supplemental_Figures_.docx [file Supplemental_Figures_.docx]

#### **SUPPLEMENTARY FIGURES**

**Supplementary Figure 1: Communication pattern benchmarking of CellAgentChat with other state-of-the-art methods.** Pearson’s Correlation of each methods communication network compared to the ensemble communication network of all methods for the: **A,** SCC dataset. **B,** PDAC dataset. **C,** SeqFISH+ mouse cortex dataset. **D,** Xenium breast cancer dataset. **E,** E12.5 developing mouse Stereo-seq dataset. **F,** E14.5 developing mouse Stereo-seq dataset. **G,** E16.5 developing mouse Stereo-seq dataset.

**Supplementary Figure 2: Benchmarking of CellAgentChat against other state-of-the-art methods with non-spatial data. A,** Heatmaps display the communication network between each cell type inferred by four methods for the SCC dataset. **B,** Heatmaps display the communication network between each cell type inferred by four methods for the Xenium breast cancer dataset. **C,** Heatmaps display the communication network between each cell type inferred by all five methods for the PDAC dataset. **D,** Heatmaps display the communication network between each cell type inferred by all five methods for the SeqFISH+ mouse somatosensory cortex dataset.

**Supplementary Figure 3: Benchmarking of CellAgentChat against other state-of-the-art methods with non-spatial data. A,** Heatmaps display the communication network between each cell type inferred by four methods for the E12.5 mouse developing hippocampus dataset. **B,** Heatmaps display the communication network between each cell type inferred by four methods for the E14.5 mouse developing hippocampus dataset. **C,** Heatmaps display the communication network between each cell type inferred by four methods for the E16.5 mouse developing hippocampus dataset.

**Supplementary Figure 4: Benchmarking of CellAgentChat against other state-of-the-art methods with spatial data. A,** Heatmaps display the communication network between each cell type inferred by five methods for the SCC dataset. **B,** Heatmaps display the communication network between each cell type inferred by five methods for the Xenium breast cancer dataset. **C,** Heatmaps display the communication network between each cell type inferred by all five methods for the PDAC dataset. **D,** Heatmaps display the communication network between each cell type inferred by all five methods for the SeqFISH+ mouse somatosensory cortex dataset.

**Supplementary Figure 5: Benchmarking of CellAgentChat against other state-of-the-art methods with spatial data. A,** Heatmaps display the communication network between each cell type inferred by five methods for the E12.5 mouse developing hippocampus dataset. **B,** Heatmaps display the communication network between each cell type inferred by five methods for the E14.5 mouse developing hippocampus dataset. **C,** Heatmaps display the communication network between each cell type inferred by five methods for the E16.5 mouse developing hippocampus dataset.

**Supplementary Figure 6: Benchmarking of CellAgentChat against other state-of-the-art methods, assessing the spatially informed nature of computed interactions.** Pearson’s correlation between the inferred interaction network and the inverse cell-distance matrix for the: **A,** SCC dataset. **B,** PDAC dataset. **C,** SeqFISH+ mouse cortex dataset. **D,** Xenium breast cancer dataset. **E,** E12.5 developing mouse Stereo-seq dataset. **F,** E14.5 developing mouse Stereo-seq dataset. **G,** E16.5 developing mouse Stereo-seq dataset.

**Supplementary Figure 7: Pathway enrichment benchmarking of CellAgentChat with existing state-of-the-art methods. A,** Reactome pathway analysis conducted on receptors derived from the top 100 inferred ligand-receptor pairs identified by each method across datasets, without using spatial data. **B,** Heatmaps display the -log10 adjusted P-values of CellAgentChat compared to each method across datasets with non-spatial (left) and spatial (right) data.

**Supplementary Figure 8: Benchmarking of CellAgentChat against other state-of-the-art methods, assessing the similarity of inferred ligand-receptor pairs in scRNA-seq data.** UpSet plots show the overlap in the top 100 LR pairs inferred by each method for the: **A,** SCC dataset. **B,** PDAC dataset. **C,** SeqFISH+ mouse cortex dataset. **D,** Xenium breast cancer dataset. **E,** E12.5 developing mouse Stereo-seq dataset. **F,** E14.5 developing mouse Stereo-seq dataset. **G,** E16.5 developing mouse Stereo-seq dataset.

**Supplementary Figure 9: Benchmarking of CellAgentChat against other state-of-the-art methods, assessing the similarity of inferred ligand-receptor pairs in spatial transcriptomics data.** UpSet plots show the overlap in the top 100 LR pairs inferred by each method for the: **A,** SCC dataset. **B,** PDAC dataset. **C,** SeqFISH+ mouse cortex dataset. **D,** Xenium breast cancer dataset. **E,** E12.5 developing mouse Stereo-seq dataset. **F,** E14.5 developing mouse Stereo-seq dataset. **G,** E16.5 developing mouse Stereo-seq dataset.

**Supplementary Figure 10: Analysis of cell communications in developing mouse hippocampus.** (**A, B)** Heatmaps display the communication network inferred by CellAgentChat at E14.5 and E16.5, respectively. (**C, D)** Dot plots illustrate the top 25 LR pairs between cell types inferred by CellAgentChat at E14.5 and E16.5, respectively.

**Supplementary Figure 11: Analysis of Cell Communications in developing mouse hippocampus using non-spatial data.** (**A, C, E,)** Heatmaps display the communication network inferred by CellAgentChat at E12.5, E14.5 and E16.5, respectively. (**B, D, F,)** Dot plots illustrate the top 25 LR pairs between cell types inferred by CellAgentChat at E12.5, E14.5 and E16.5, respectively.

**Supplementary Figure 12: CellAgentChat can capture similar interactions across different technical samples.** (**A, B, C,)** Heatmaps display the communication network inferred by CellAgentChat in the developing mouse hippocampus at E16.5 across three different 2D spatial slices. **D,** Pairwise Pearson’s Correlation comparison of the communication pattern between each of the three slices.

**Supplementary Figure 13: Inferred interactions by CellAgentChat on Human breast cancer and pancreatic ductal adenocarcinoma datasets A,** UMAP visualization of scRNA-seq data of Xenium human breast cancer dataset. **B,** UMAP visualization of scRNA-seq data of PDAC dataset. (**C, E,)** Heatmaps display the communication network inferred by CellAgentChat in breast cancer and PDAC, respectively. (**D, F,)** Dot plots illustrate the top 25 LR pairs between cell types inferred by CellAgentChat in breast cancer and PDAC, respectively.

**Supplementary Figure 14: Inferred interactions by CellAgentChat on Mouse Somatosensory cortex A,** UMAP visualization of scRNA-seq data of SeqFISH+ mouse somatosensory cortex dataset. (**B,)** Heatmaps display the communication network inferred by CellAgentChat with spatial data. (**C,)** Dot plots illustrate the top 25 LR pairs between cell types inferred by CellAgentChat with spatial data.

**Supplementary Figure 15: Identification of key downstream genes related to breast cancer after in silico blockage of top receptors. A,** Matrix plot shows the expression across cell types of the receptors involved in the top 25 LR pairs inferred by CellAgentChat. **B,** Significance of receptor association with breast cancer as represented by -log10 adjusted P-values (FDR corrected-Benjamini–Hochberg). Results are using the dense MLP without incorporating TF-prior LR-TF, TF-gene network information. (**C, D, E,)** Matrix plots display the mean change in expression of each target gene for each cell type for, *PECAM1*, *SDC4* and *CXCR4*, respectively (left). Identification of the top 10 downstream genes (target genes) with the highest percent change in absolute expression upon blocking *PECAM1*, *SDC4* and *CXCR4*, respectively (middle). A red highlight indicates genes associated with breast cancer. Survival analysis displaying the probability of survival of high vs. low receptor expression groups for *PECAM1*, *SDC4* and *CXCR4*, respectively (right).

**Supplementary Figure 16: CellAgentChat’s Animation depicts the cell receiving score (CRS) across individual cells for each candidate receptor.** After receptor blocking, all interactions involving these cell types will be completely blocked (go to zero), causing a shift in the interaction profile of the cells.

**Supplementary Figure 17: Identification of key downstream genes related to breast cancer after in silico blockage of top receptors.** (**A, B, C,)** Matrix plots display the mean change in expression of each target gene for each cell type for, *AVPR1A*, *CD80* and *CD93*, respectively (left). Identification of the top 10 downstream genes (target genes) with the highest percent change in absolute expression upon blocking *AVPR1A*, *CD80* and *CD93*, respectively (middle). A red highlight indicates genes associated with breast cancer. Survival analysis displaying the probability of survival of high vs. low receptor expression groups for *AVPR1A*, *CD80* and *CD93*, respectively (right).

**Supplementary Figure 18: Identification of key downstream genes related to PDAC after in silico blockage of top receptors. A,** Significance of receptor association with pancreatic ductal adenocarcinoma (PDAC) as represented by -log10 adjusted P-values (binomial test; FDR corrected-Benjamini–Hochberg). *NOTCH3*, *PLAUR*, *ITGA11* and *CD74*, highlighted in red, have significant -log10 adjusted P-values. **B,** The cell receiving score (CRS) for all interactions involving the receptors *NOTCH3*, *PLAUR*, *ITGA11* and *CD74* determined using CellAgentChat’s animation platform. The size of the cell in the animation indicates the CRS. (**C, E, G, I,)** Matrix plots display the mean change in expression of each target gene for each cell type for *NOTCH3*, *PLAUR*, *ITGA11* and *CD74*, respectively. A red highlight indicates downstream genes associated with PDAC. **(D, F, H, J,)** Survival analysis displaying the probability of survival of high vs. low receptor expression groups for *NOTCH3*, *PLAUR*, *ITGA11* and *CD74*, respectively.

**Supplementary Figure 19: Identification of key downstream genes related to PDAC after in silico blockage of top receptors. A,** Matrix plot shows the expression across cell types of the receptors involved in the top 25 ligand-receptor pairs inferred by CellAgentChat. **B,** Significance of receptor association with PDAC, as represented by -log10 adjusted P-values (FDR corrected-Benjamini–Hochberg). Results are using the dense MLP without incorporating TF-prior LR-TF, TF-gene network information. **C,** Identification of the top 25 downstream genes (target genes) with the highest percent change in absolute expression upon blocking *NOTCH3*, *PLAUR*, *ITGA11* and *CD74*, respectively. A red highlight indicates downstream genes associated with PDAC.

**Supplementary Figure 20: Comparison of CellAgentChat in silico receptor blocking with scGen. A,** Enrichment for the breast cancer gene set of the significantly perturbed genes based on the in silico perturbation of the selected 13 receptors using CellAgentChat and scGen. The enrichment is represented as the -log10 adjusted P-values (binomial test; FDR corrected- Benjamini–Hochberg). *EGFR, PDCD1, PECAM1, SDC4, CXCR4, AVPR1A, CTLA4, CD80* and *CD93*, highlighted in red, have significant -log10 adjusted P-values for the breast cancer gene set enrichment using CellAgentChat but not scGen. **B,** Boxplot showing the absolute breast cancer gene scores for downstream target gene predictions following receptor perturbations in breast cancer, generated using CellAgentChat and scGen. P-values calculated using Wilcoxon one-sided test. **C,** Enrichment for the PDAC gene set of the significantly perturbed genes based on the in silico perturbation of the selected 16 receptors using CellAgentChat and scGen. The enrichment is represented as the -log10 adjusted P-values (binomial test; FDR corrected-Benjamini–Hochberg). *NOTCH3, PLAUR* and *CD74*, highlighted in red, have significant -log10 adjusted P-values for the PDAC gene set enrichment using CellAgentChat. **D,** Boxplot showing the absolute breast cancer gene scores for downstream target gene predictions following receptor perturbations in PDAC, generated using CellAgentChat and scGen. P-values calculated using Wilcoxon one-sided test. **e,** Survival analysis displaying the probability of survival of high vs. low receptor expression groups for receptors found significant by scGen but not CellAgentChat, *SDC1*, *TNFRSF10A* and *ITGA5*, respectively.

**Supplementary Figure 21: Inferred interactions by CellAgentChat in Tumor and Healthy Regions of the Pancreas in a PDAC Patient. A,** Heatmap displays the communication network inferred by CellAgentChat in the tumor region of PDAC. **B**, Dot plot illustrates the top 25 LR pairs between cell types inferred by CellAgentChat in the tumor region of PDAC. **C,** Heatmap displays the communication network inferred by CellAgentChat in the healthy region of PDAC. **D**, Dot plot illustrates the top 25 LR pairs between cell types inferred by CellAgentChat in the healthy region of PDAC.

**Supplementary Figure 22: Identification of key downstream genes related to PDAC after in silico blockage of top receptors in tumor and healthy regions of the pancreas. A,** Enrichment for the PDAC gene set of the significantly perturbed genes based on the in silico perturbation of the selected 11 receptors in the tumor region. The enrichment is represented as the -log10 adjusted P-values (binomial test; FDR corrected-Benjamini–Hochberg). *LRP1*, *CAV1* and *CD93*, highlighted in red, have significant -log10 adjusted P-values for the PDAC gene set enrichment. **B,** Enrichment for the PDAC gene set of the significantly perturbed genes based on the in silico perturbation of the selected 15 receptors in the healthy pancreas region. The enrichment is represented as the -log10 adjusted P-values (binomial test; FDR corrected-Benjamini–Hochberg). No receptors have significant -log10 adjusted P-values for the PDAC gene set enrichment. **(C, E, G,)** Matrix plots display the mean change in expression of each target gene for each cell type for, *LRP1*, *CAV1* and *CD93*, respectively. A red highlight indicates genes associated with PDAC. **(D, F, H,)** Survival analysis displaying the probability of survival of high vs. low receptor expression groups for *LRP1*, *CAV1* and *CD93*, respectively.

**Supplementary Figure 23: Identification of key downstream genes related to PDAC after in silico blockage of top receptors in the tumor region of pancreas.** Identification of the top 25 downstream genes (target genes) with the highest percent change in absolute expression upon blocking **A,** *LRP1*, **B,** *CD93*, and **C,** *CAV1*, respectively. A red highlight indicates downstream genes associated with PDAC.

**Supplementary Figure 24: Identification of key downstream genes related to PDAC after in silico blockage of tumor top receptors in the healthy region of the pancreas. A,** Enrichment for the PDAC gene set of the significantly perturbed genes based on the in silico perturbation of the selected 11 receptors in the tumor region applied to cells in the healthy region of the pancreas. **B,** Identification of the top 10 downstream genes with the highest percent change in absolute expression upon blocking *LRP1*. A red highlight indicates genes associated with PDAC. **C,** Matrix plots display the mean change in expression of each target gene for each cell type for, *LRP1.* A red highlight indicates genes associated with PDAC.

**Supplementary Figure 25: Identification of key downstream genes related to PDAC after in silico blockage of top receptors using a dense neural network structure. A,** Enrichment for the PDAC gene set of the significantly perturbed genes based on the in silico perturbation of the selected 11 receptors in the tumor region. The enrichment is represented as the -log10 adjusted P-values (binomial test; FDR corrected-Benjamini–Hochberg). **B,** Enrichment for the PDAC gene set of the significantly perturbed genes based on the in silico perturbation of the selected 15 receptors in the healthy region. The enrichment is represented as the -log10 adjusted P-values (binomial test; FDR corrected-Benjamini–Hochberg). **C,** Enrichment for the PDAC gene set of the significantly perturbed genes based on the in silico perturbation of the selected 11 receptors in the tumor region but applied to the healthy region. The enrichment is represented as the -log10 adjusted P-values (binomial test; FDR corrected-Benjamini–Hochberg).

**Supplementary Figure 26: Comparison of molecular weights of ligands found by CellAgentChat in long-range and short-range modes.** Boxplot compares the molecular weights of ligands involved in the top ligand-receptor (LR) pairs identified in the short-range mode (= 10) versus the long-range mode ( = 0.1). P-values calculated using Wilcoxon one-sided test.

**Supplementary Figure 27: CellAgentChat Dynamic Simulations. A,** Overview of ABM dynamic update over time steps using the deep learning model. **B**, Boxplot illustrating the Pearson’s correlation between the pseudotime trajectory and the dynamic trajectory generated by the ABM for all genes (median r2=0.49), as well as for ligand and receptor genes specifically (median r2=0.48) for a total of 5 time steps. **C,** Pseudotime trajectory vs. ABM dynamic trajectory of the receptor *ITGA6* for 5 time steps. **D**, Pseudotime trajectory vs. ABM dynamic trajectory of the ligand *MMP1* for 5 time steps. **E**, Pseudotime trajectory vs. ABM dynamic trajectory of the ligand *CALR* for 5 time steps. **F**, Pseudotime trajectory vs. ABM dynamic trajectory of the receptor *CD44* for 5 time steps*.* **G,** Box plot of the Pearson’s Correlation of the pseudotime trajectory vs. ABM dynamic trajectory for up to 20 time steps. **H,** Average number of cells per bin in the SCC dataset for time steps 1-100.

**Supplementary Figure 28: Confirmation that receptor blocking, achieved by nullifying the receptor, does not significantly alter the resulting gene expression of cells. A,** UMAP visualization of cells before and after perturbation for four receptors, *SDC4*, *EGFR*, *CD44* and *ITGB4* in the SCC dataset. UMAP projections show that the cell expression does not deviate much after receptor perturbation. **B,** UMAP visualization of cells before and after perturbation for four receptors, *Lrp1*, *Vipr1*, *Crh1* and *Htr6* in the Stereo-seq E12.5 mouse hippocampus dataset. UMAP projections show that the cell expression does not deviate much after receptor perturbation.

**Supplementary Figure 29: Confirmation that receptor blocking, achieved by permutating receptor features variables and lowering receptor expression, does not significantly alter the resulting gene expression of cells. A,** UMAP visualization of cells before and after perturbation for four receptors, *SDC4*, *EGFR*, *CD44* and *ITGB4* in the SCC dataset. UMAP projections show that the cell expression does not deviate much after receptor perturbation. **B,** UMAP visualization of cells before and after perturbation for four receptors, *Lrp1*, *Vipr1*, *Crh1* and *Htr6* in the Stereo-seq E12.5 mouse hippocampus dataset. UMAP projections show that the cell expression does not deviate much after receptor perturbation.

**Supplementary Figure 30: Receptor importance scores across receptors and datasets (A, B, C, D, E, F, G,)** Histogram of the receptor importance for the SCC, PDAC, SeqFISH+, Xenium, E12.5 mouse brain, E14.5 mouse brain and E16.5 mouse brain datasets, respectively. is always positive.

**Supplementary Figure 31: Direction consistency of CellAgentChat predicted downstream gene expression when *EGFR* is perturbed. A,** Heatmap of the change in expression direction after perturbation of top 10 Tumor markers, tumor associated stromal markers and stromal normal genes when *EGFR* is blocked. Results show consistency in the expression direction change after perturbation within individual cell types for key marker genes. **B,** Boxplot of the absolute gene score percent change between cell type specific marker genes and non-marker genes (random genes), before and after perturbation of *EGFR.* P-values calculated using Wilcoxon one-sided test.

**Supplementary Figure 32:** **Direction consistency of CellAgentChat predicted downstream gene expression when *PDCD1* is perturbed. A,** Heatmap of the change in expression direction after perturbation of top 10 Tumor markers, tumor associated stromal markers and stromal normal genes when *PDCD1* is blocked. Results show consistency in the expression direction change after perturbation within individual cell types for key marker genes. **B,** Boxplot of the absolute gene score percent change between cell type specific marker genes and non-marker genes (random genes), before and after perturbation of *PDCD1.* P-values calculated using Wilcoxon one-sided test.

**Supplementary Figure 33: Direction consistency of CellAgentChat predicted downstream gene expression when *CTLA4* is perturbed. A,** Heatmap of the change in expression direction after perturbation of top 10 Tumor markers, tumor associated stromal markers and stromal normal genes when *CTLA4* is blocked. Results show consistency in the expression direction change after perturbation within individual cell types for key marker genes. **B,** Boxplot of the absolute gene score percent change between cell type specific marker genes and non-marker genes (random genes), before and after perturbation of *CTLA4.* P-values calculated using Wilcoxon one-sided test.

**Supplementary Figure 34: Ablation Studies highlighting the impact of CellAgentChat components on performance and predictive accuracy. (A, B,)** Heatmaps display the communication pattern of the SeqFISH+ mouse somatosensory cortex dataset using raw counts with non-spatial and spatial data, respectively. **C,** Pearson’s Correlation between inferred interaction network with normalized expression values vs raw counts and the ensemble of other state-of-the-art methods inferred interactions. **D,** Pearson’s Correlation between inferred interaction network with normalized expression values vs raw counts and the cell-distance matrix. **E,** Boxplot comparing the Pearson’s correlation between inferred cell communication by CellAgentChat and the ensemble of all methods versus when the Gene network in the Neural network and the conversion rate are ablated across scRNA-seq data. **F,** Boxplot comparing the Pearson’s correlation between inferred cell communication by CellAgentChat and the ensemble of all methods versus when the Gene network in the Neural network and the conversion rate are ablated across scRNA-seq + ST data. **G,** Boxplot comparing the Pearson’s correlation between the inferred cell communication for each version of CellAgentChat and the inverse cell-distance matrix across datasets. P-values in panels e-g calculated using Wilcoxon one-sided test.

**Supplementary Figure 35: CellAgentChat animation platform and background distribution scaling for spatial data results. A,** Animation platform of CellAgentChat to visualize the changes in cell receiving score (CRS) for each cell in real-time. **B,** Heatmap of the communication network between cell types, created using significant interactions determined from the permutation test without scaling. We perform the permutation test using spatial data **C,** Heatmap of the communication network between cell types, created using significant interactions determined from the permutation test with scaling. We perform the permutation test using non-spatial data. The background gamma distribution for each LR pair uses non-spatial mode. For scaling, we divide the scale parameter of the distribution by the average distance between all cells. Additionally, we halve both the alpha and the modified scale values.
